# Supplementary material
Source: ML conference proceedings conference paper supplement (https://aclanthology.org/2020.findings-emnlp.102)
Supplement: OptionalSupplementaryMaterial [file 2020.findings-emnlp.102.OptionalSupplementaryMaterial.zip]

## A Appendices

### A.1 Hyper-parameters and Training Details

In our experiments, the **BiLSTM+MLP** predicate tagging model only takes words and lemmas as input, and its encoder structure is the same as our main model, so the hyper-parameters are also consistent with our main model. With the **BERT+MLP** predicate tagging model, the motivation for choosing this instead of using BERT as embedding in the **BiLSTM+MLP** architecture is to achieve fair comparability with the results of (Zhou et al., 2019).

For the hyper-parameters of our main model, we borrowed most parameter settings from (Dozat and Manning, 2017; Wang et al., 2019), including dropout and initialization strategies. Hyper-parameters for our baseline and proposed high-order model are shown in Table 5. We use 100-dimensional Glove (Pennington et al., 2014) pre-trained word embeddings for English and 300-dimensional FastText embeddings (Bojanowski et al., 2017; Grave et al., 2018) for all other languages. As for the pre-training, ELMo (Peters et al., 2018) is only used in English, we take the weighted sum of the 3 layers as the final features, while different versions of BERT (Devlin et al., 2019) are used in different languages, as shown in Table 6, we always use the second-to-last layer outputs as the pre-trained features.

Following the work of (Wang et al., 2019), during model training, the training strategy includes two phases. In the first phase, we used Adam (Kingma and Ba, 2014) and annealed the learning rate 0.5 every 10,000 steps. When the training reaches 5,000 steps without improvement, the model optimization enters the second phase; the Adam optimizer is replaced by AMSGrad (Reddi et al., 2018). We trained the model for maximum 100K update steps with batch sizes of {4K, 2K, 3K, 4K, 6K, 6K} tokens for CA, CS, DE, EN, ES, JA, and ZH, respectively. The training is terminated with an early stopping mechanism when there is no improvement after 10,000 steps on the development sets.

### A.2 Detail Results

The proverb that *there is no such thing as a free lunch* tells us that no method works in every condition and scope. We explore our proposed high order structure learning for SRL in different languages and conditions: using pre-training or not, given or

| Hidden Layer                    | Hidden Sizes            |
|---------------------------------|-------------------------|
| Word Embedding                  | 100 (en) / 300 (others) |
| Lemma Embedding                 | 100                     |
| Predicate Indicator / Sense Emb | 50 / 50                 |
| ELMo/BERT Linear                | 100                     |
| Stacked BiLSTM                  | 3 × 600                 |
| Biaffine Arc/Label Scorer       | 600                     |
| Triaffine Arc Scorer            | 150                     |
| Dropouts                        | Dropout Prob.           |
| Word/Lemma/Predicate            | 20%                     |
| BiLSTM (FF/recur)               | 45%/25%                 |
| Biaffine Arc/Label Scorer       | 25%/33%                 |
| Triaffine Arc Scorer            | 25%                     |
| Optimizer & Loss                | Value                   |
| Balance param $\lambda$         | 0.1                     |
| Adam $\beta_1$                  | 0                       |
| Adam $\beta_2$                  | 0.95                    |
| Learning rate                   | $1e^{-2}$               |
| LR decay                        | 0.5                     |
| L2 regularization               | $3e^{-9}$               |

Table 5: Hyper-parameters for baseline and high-order SRL models in our experiment.

|    | Version                                          | Provider                |
|----|--------------------------------------------------|-------------------------|
| CA | <i>multi_cased.L-12_H-768_A-12</i>               | (Devlin et al., 2019)   |
| CS | <i>Slavic BERT: slavic_cased.L-12_H-768_A-12</i> | (Arkhipov et al., 2019) |
| DE | <i>multi_cased.L-12_H-768_A-12</i>               | (Devlin et al., 2019)   |
| EN | <i>www_uncased.L-24_H-1024_A-16</i>              | (Devlin et al., 2019)   |
| ES | <i>BETO: spanish.www_cased.L-12_H-768_A-12</i>   | (Cañete et al., 2020)   |
| JA | <i>NICT BERT: japanese_100k.L-12_H-768_A-12</i>  | (NICT, 2020)            |
| ZH | <i>chinese.L-12_H-768_A-12</i>                   | (Devlin et al., 2019)   |

Table 6: BERT versions for different languages.

not given predicates, and different high-order structure combinations. We report all possible results on development sets, in-domain test sets, and out-of-domain test sets in Tables 7, 8, 9 and 10. The experimental results illustrate the following points:

1. In different languages, combinations of high-order structures bring different improvements. Some high-order structure combinations are even worse for performance in some languages.

2. Pre-training can bring about a significant improvement in performance on both in-domain and out-of-domain test sets; however, the in-domain improvement is significantly greater than that of out-of-domain when the two domains are far apart. In particular, the difference between in-domain and out-of-domain in German and English is large, while the two domains in Czech are similar.

3. The SRL results in German are lower than in other languages, the data analysis found that the proportion of predicates is very small, resulting in the sparse targets, which can not train the model well, especially when no predicates are pre-identified.

| Language | Method                 | Dev   |       |                | Test  |       |                | OOD   |       |                |
|----------|------------------------|-------|-------|----------------|-------|-------|----------------|-------|-------|----------------|
|          |                        | P     | R     | F <sub>1</sub> | P     | R     | F <sub>1</sub> | P     | R     | F <sub>1</sub> |
| CA       | baseline               | 85.62 | 83.66 | 84.63          | 85.85 | 84.09 | 84.96          |       |       |                |
|          | +sib                   | 85.91 | 83.98 | 84.94          | 86.09 | 84.46 | 85.27          |       |       |                |
|          | +cop                   | 85.78 | 83.83 | 84.79          | 85.97 | 84.17 | 85.06          |       |       |                |
|          | +gp                    | 86.24 | 83.25 | 84.72          | 86.11 | 83.51 | 84.79          |       |       |                |
|          | +sib+cop               | 85.70 | 84.25 | 84.97          | 85.90 | 84.85 | <b>85.37</b>   |       |       |                |
|          | +sib+gp                | 85.71 | 84.00 | 84.85          | 85.81 | 84.19 | 84.99          |       |       |                |
|          | +cop+gp                | 86.05 | 83.98 | <b>85.00</b>   | 85.74 | 83.72 | 84.72          |       |       |                |
|          | <b>+ALL</b>            | 85.64 | 84.09 | 84.86          | 85.67 | 84.24 | 84.95          |       |       |                |
|          | baseline <sup>+B</sup> | 86.95 | 85.74 | 86.34          | 87.10 | 85.72 | 86.40          |       |       |                |
|          | +sib                   | 86.94 | 85.92 | 86.43          | 87.15 | 86.05 | 86.59          |       |       |                |
|          | +cop                   | 87.15 | 85.96 | 86.55          | 87.14 | 86.00 | 86.57          |       |       |                |
|          | +gp                    | 87.17 | 86.00 | 86.58          | 86.87 | 85.93 | 86.40          |       |       |                |
|          | +sib+cop               | 86.96 | 86.57 | 86.76          | 86.89 | 86.53 | 86.71          |       |       |                |
|          | +sib+gp                | 87.26 | 86.55 | <b>86.90</b>   | 87.10 | 86.40 | 86.75          |       |       |                |
|          | +cop+gp                | 87.24 | 86.12 | 86.68          | 87.08 | 85.97 | 86.52          |       |       |                |
|          | <b>+ALL</b>            | 87.49 | 86.11 | 86.79          | 87.52 | 86.29 | <b>86.90</b>   |       |       |                |
| CS       | baseline               | 91.20 | 89.79 | 90.49          | 90.87 | 89.49 | 90.18          | 91.22 | 89.88 | 90.54          |
|          | +sib                   | 91.30 | 89.71 | 90.50          | 91.08 | 89.56 | 90.32          | 91.25 | 89.72 | 90.48          |
|          | +cop                   | 91.40 | 89.77 | 90.58          | 91.09 | 89.56 | 90.32          | 91.27 | 89.75 | 90.51          |
|          | +gp                    | 91.35 | 89.63 | 90.48          | 91.16 | 89.40 | 90.27          | 91.31 | 89.62 | 90.46          |
|          | +sib+cop               | 91.36 | 89.88 | <b>90.81</b>   | 91.33 | 89.89 | <b>90.60</b>   | 91.50 | 90.03 | <b>90.75</b>   |
|          | +sib+gp                | 91.26 | 89.68 | 90.47          | 91.09 | 89.48 | 90.28          | 91.29 | 89.79 | 90.53          |
|          | +cop+gp                | 91.24 | 89.61 | 90.42          | 91.01 | 89.51 | 90.26          | 91.23 | 89.73 | 90.48          |
|          | <b>+ALL</b>            | 91.18 | 89.81 | 90.49          | 90.96 | 89.65 | 90.30          | 91.15 | 89.85 | 90.49          |
|          | baseline <sup>+B</sup> | 92.12 | 91.09 | 91.61          | 91.98 | 90.99 | 91.48          | 91.98 | 91.23 | 91.60          |
|          | +sib                   | 92.31 | 91.62 | <b>91.96</b>   | 91.98 | 91.23 | 91.60          | 91.94 | 91.50 | 91.72          |
|          | +cop                   | 92.11 | 91.27 | 91.69          | 92.08 | 91.25 | 91.66          | 91.97 | 91.49 | 91.73          |
|          | +gp                    | 92.02 | 91.19 | 91.60          | 91.97 | 91.20 | 91.58          | 91.85 | 91.32 | 91.59          |
|          | +sib+cop               | 92.04 | 91.30 | 91.67          | 92.38 | 91.49 | <b>91.93</b>   | 91.84 | 91.47 | 91.65          |
|          | +sib+gp                | 92.11 | 91.24 | 91.68          | 92.06 | 91.15 | 91.61          | 91.84 | 91.41 | 91.63          |
|          | +cop+gp                | 91.99 | 91.32 | 91.65          | 91.94 | 91.25 | 91.60          | 91.87 | 91.61 | <b>91.74</b>   |
|          | <b>+ALL</b>            | 92.03 | 91.26 | 91.65          | 91.99 | 91.14 | 91.56          | 91.75 | 91.32 | 91.53          |
| DE       | baseline               | 75.83 | 72.51 | 74.13          | 77.48 | 74.61 | 76.02          | 71.34 | 67.73 | 69.49          |
|          | +sib                   | 76.63 | 73.36 | 74.96          | 77.01 | 75.54 | 76.27          | 71.66 | 69.36 | <b>70.49</b>   |
|          | +cop                   | 74.43 | 72.05 | 73.22          | 76.73 | 74.98 | 75.85          | 69.84 | 68.55 | 69.19          |
|          | +gp                    | 75.69 | 73.02 | 74.33          | 76.33 | 75.11 | 75.71          | 69.74 | 67.35 | 68.53          |
|          | +sib+cop               | 76.24 | 73.25 | <b>74.72</b>   | 77.53 | 75.33 | <b>76.41</b>   | 71.28 | 68.88 | 70.06          |
|          | +sib+gp                | 75.29 | 73.02 | 74.14          | 75.86 | 74.74 | 75.29          | 70.15 | 67.79 | 68.95          |
|          | +cop+gp                | 76.22 | 72.05 | 74.08          | 77.00 | 74.25 | 75.60          | 69.99 | 66.76 | 68.33          |
|          | <b>+ALL</b>            | 75.13 | 72.57 | 73.83          | 76.79 | 74.18 | 75.46          | 71.46 | 67.46 | 69.40          |
|          | baseline <sup>+B</sup> | 84.48 | 82.70 | 83.58          | 85.77 | 84.66 | 85.21          | 71.77 | 70.02 | 70.88          |
|          | +sib                   | 83.87 | 83.15 | 83.51          | 84.97 | 85.34 | 85.15          | 72.14 | 71.86 | 72.00          |
|          | +cop                   | 84.58 | 83.04 | 83.80          | 84.93 | 85.09 | 85.01          | 71.48 | 71.59 | 71.53          |
|          | +gp                    | 83.82 | 83.15 | 83.49          | 85.01 | 84.53 | 84.77          | 71.80 | 70.67 | 71.23          |
|          | +sib+cop               | 84.67 | 83.61 | <b>84.14</b>   | 85.82 | 85.27 | <b>85.54</b>   | 72.23 | 71.48 | <b>71.85</b>   |
|          | +sib+gp                | 84.46 | 82.58 | 83.51          | 85.21 | 84.10 | 84.65          | 71.93 | 69.04 | 70.45          |
|          | +cop+gp                | 83.49 | 82.30 | 82.89          | 85.20 | 84.41 | 84.80          | 70.88 | 69.69 | 70.28          |
|          | <b>+ALL</b>            | 84.53 | 82.70 | 83.60          | 84.95 | 84.17 | 84.56          | 71.39 | 68.17 | 69.74          |
| EN       | baseline               | 90.15 | 86.27 | 88.17          | 91.29 | 88.00 | 89.61          | 81.37 | 77.12 | 79.19          |
|          | +sib                   | 89.94 | 86.67 | 88.27          | 91.46 | 88.53 | 89.97          | 81.76 | 77.85 | 79.76          |
|          | +cop                   | 90.03 | 86.59 | 88.27          | 91.40 | 88.45 | 89.90          | 81.89 | 78.07 | 79.94          |
|          | +gp                    | 89.86 | 86.13 | 87.96          | 91.41 | 88.14 | 89.75          | 82.20 | 78.51 | 80.31          |
|          | +sib+cop               | 90.20 | 86.97 | <b>88.55</b>   | 91.33 | 88.74 | 90.02          | 81.80 | 78.36 | 80.04          |
|          | +sib+gp                | 90.00 | 86.89 | 88.42          | 91.21 | 88.58 | 89.87          | 81.38 | 77.90 | 79.60          |
|          | +cop+gp                | 89.69 | 86.58 | 88.11          | 91.26 | 88.68 | 89.95          | 81.32 | 78.02 | 79.64          |
|          | <b>+ALL</b>            | 90.03 | 86.91 | 88.44          | 91.60 | 88.95 | <b>90.26</b>   | 82.6  | 78.75 | <b>80.63</b>   |
|          | baseline <sup>+B</sup> | 91.35 | 88.84 | 90.08          | 92.31 | 90.18 | 91.23          | 86.14 | 83.49 | 84.79          |
|          | +sib                   | 91.3  | 89.11 | 90.19          | 92.49 | 90.58 | 91.53          | 85.96 | 83.97 | 84.95          |
|          | +cop                   | 91.3  | 89.19 | 90.23          | 92.21 | 90.5  | 91.35          | 86.03 | 84.07 | 85.04          |
|          | +gp                    | 91.66 | 88.6  | 90.11          | 92.77 | 90.09 | 91.41          | 86.22 | 83.1  | 84.63          |
|          | +sib+cop               | 91.16 | 89.6  | 90.37          | 92.36 | 90.84 | 91.6           | 85.59 | 83.92 | 84.75          |
|          | +sib+gp                | 91.62 | 88.99 | 90.28          | 92.64 | 90.44 | 91.53          | 86.33 | 83.61 | 84.95          |
|          | +cop+gp                | 91.27 | 89.02 | 90.14          | 92.37 | 90.35 | 91.35          | 86.03 | 83.88 | 84.94          |
|          | <b>+ALL</b>            | 91.56 | 89.35 | <b>90.44</b>   | 92.59 | 90.98 | <b>91.77</b>   | 86.49 | 83.80 | <b>85.13</b>   |

Table 7: w/ pre-identified predicate results.

| Language | Method                 | Dev   |       |                | Test  |       |                | OOD |   |                |
|----------|------------------------|-------|-------|----------------|-------|-------|----------------|-----|---|----------------|
|          |                        | P     | R     | F <sub>1</sub> | P     | R     | F <sub>1</sub> | P   | R | F <sub>1</sub> |
| ES       | baseline               | 84.58 | 82.58 | 83.57          | 84.97 | 82.60 | 83.77          |     |   |                |
|          | +sib                   | 84.90 | 83.11 | <b>83.99</b>   | 85.18 | 83.28 | 84.22          |     |   |                |
|          | +cop                   | 84.66 | 82.76 | 83.70          | 85.12 | 83.21 | 84.15          |     |   |                |
|          | +gp                    | 84.95 | 82.33 | 83.62          | 85.51 | 82.31 | 83.88          |     |   |                |
|          | +sib+cop               | 84.66 | 82.98 | 83.81          | 85.36 | 83.45 | <b>84.39</b>   |     |   |                |
|          | +sib+gp                | 84.73 | 83.13 | 83.92          | 85.05 | 83.21 | 84.12          |     |   |                |
|          | +cop+gp                | 84.80 | 82.42 | 83.59          | 85.35 | 82.87 | 84.09          |     |   |                |
|          | <b>+ALL</b>            | 84.89 | 82.90 | 83.89          | 85.12 | 83.29 | 84.20          |     |   |                |
|          | baseline <sup>+B</sup> | 87.14 | 85.91 | 86.52          | 87.23 | 85.98 | 86.60          |     |   |                |
|          | +sib                   | 87.36 | 85.62 | 86.48          | 87.48 | 85.97 | 86.72          |     |   |                |
|          | +cop                   | 87.03 | 85.94 | 86.48          | 87.19 | 86.11 | 86.65          |     |   |                |
|          | +gp                    | 87.21 | 86.04 | 86.62          | 87.22 | 85.95 | 86.58          |     |   |                |
|          | +sib+cop               | 86.98 | 86.45 | 86.71          | 87.24 | 86.67 | <b>86.96</b>   |     |   |                |
|          | +sib+gp                | 87.62 | 85.66 | 86.63          | 87.62 | 85.84 | 86.72          |     |   |                |
|          | +cop+gp                | 87.26 | 85.85 | 86.55          | 87.09 | 85.82 | 86.45          |     |   |                |
|          | <b>+ALL</b>            | 87.49 | 86.11 | <b>86.79</b>   | 87.52 | 86.29 | 86.90          |     |   |                |
| JA       | baseline               | 88.49 | 76.68 | 82.16          | 88.15 | 77.79 | 82.65          |     |   |                |
|          | +sib                   | 87.30 | 78.45 | 82.64          | 86.14 | 79.85 | 82.88          |     |   |                |
|          | +cop                   | 87.71 | 77.22 | 82.13          | 87.90 | 78.58 | 82.98          |     |   |                |
|          | +gp                    | 86.65 | 77.15 | 81.63          | 86.03 | 78.62 | 82.16          |     |   |                |
|          | +sib+cop               | 87.97 | 78.78 | <b>83.12</b>   | 87.51 | 79.38 | <b>83.25</b>   |     |   |                |
|          | +sib+gp                | 88.32 | 77.72 | 82.68          | 88.34 | 78.51 | 83.14          |     |   |                |
|          | +cop+gp                | 88.36 | 76.99 | 82.28          | 88.09 | 78.04 | 82.76          |     |   |                |
|          | <b>+ALL</b>            | 88.86 | 77.18 | 82.61          | 88.17 | 78.28 | 82.93          |     |   |                |
|          | baseline <sup>+B</sup> | 89.93 | 80.89 | 85.17          | 89.63 | 81.83 | 85.55          |     |   |                |
|          | +sib                   | 89.29 | 81.06 | 84.98          | 89.02 | 82.08 | 85.41          |     |   |                |
|          | +cop                   | 89.99 | 80.56 | 85.02          | 89.71 | 81.57 | 85.45          |     |   |                |
|          | +gp                    | 89.43 | 80.40 | 84.67          | 88.88 | 81.08 | 84.80          |     |   |                |
|          | +sib+cop               | 88.67 | 82.34 | <b>85.39</b>   | 88.65 | 83.32 | <b>85.90</b>   |     |   |                |
|          | +sib+gp                | 89.90 | 80.05 | 84.69          | 89.75 | 81.27 | 85.30          |     |   |                |
|          | +cop+gp                | 89.20 | 81.27 | 85.05          | 88.59 | 82.03 | 85.19          |     |   |                |
|          | <b>+ALL</b>            | 90.51 | 80.33 | 85.12          | 89.69 | 81.66 | 85.49          |     |   |                |
| ZH       | baseline               | 87.28 | 83.84 | 85.52          | 87.95 | 83.63 | 85.73          |     |   |                |
|          | +sib                   | 87.58 | 83.96 | 85.73          | 87.94 | 83.80 | 85.82          |     |   |                |
|          | +cop                   | 88.33 | 83.40 | 85.80          | 88.61 | 83.29 | 85.87          |     |   |                |
|          | +gp                    | 88.08 | 82.25 | 85.07          | 88.46 | 82.01 | 85.12          |     |   |                |
|          | +sib+cop               | 87.95 | 83.81 | 85.83          | 88.09 | 83.64 | 85.81          |     |   |                |
|          | +sib+gp                | 88.28 | 83.42 | 85.78          | 88.20 | 83.26 | 85.66          |     |   |                |
|          | +cop+gp                | 88.38 | 82.56 | 85.37          | 88.54 | 82.63 | 85.48          |     |   |                |
|          | <b>+ALL</b>            | 88.44 | 83.40 | <b>85.85</b>   | 88.35 | 83.82 | <b>86.02</b>   |     |   |                |
|          | baseline <sup>+B</sup> | 89.63 | 86.69 | 88.13          | 89.94 | 86.60 | 88.24          |     |   |                |
|          | +sib                   | 89.47 | 87.40 | 88.42          | 89.64 | 87.34 | 88.48          |     |   |                |
|          | +cop                   | 89.63 | 87.35 | <b>88.48</b>   | 89.79 | 87.33 | 88.54          |     |   |                |
|          | +gp                    | 89.16 | 86.74 | 87.93          | 89.54 | 86.69 | 88.09          |     |   |                |
|          | +sib+cop               | 89.80 | 86.92 | 88.34          | 89.97 | 87.45 | <b>88.69</b>   |     |   |                |
|          | +sib+gp                | 89.60 | 87.39 | <b>88.48</b>   | 89.79 | 87.30 | 88.53          |     |   |                |
|          | +cop+gp                | 89.48 | 87.18 | 88.32          | 89.70 | 87.36 | 88.52          |     |   |                |
|          | <b>+ALL</b>            | 88.95 | 87.58 | 88.26          | 89.07 | 87.71 | 88.38          |     |   |                |

Table 8: w/ pre-identified predicate results.

| Language | Method                 | Dev   |       |                | Test  |       |                | OOD   |       |                |
|----------|------------------------|-------|-------|----------------|-------|-------|----------------|-------|-------|----------------|
|          |                        | P     | R     | F <sub>1</sub> | P     | R     | F <sub>1</sub> | P     | R     | F <sub>1</sub> |
| CA       | baseline               | 83.97 | 82.62 | 83.29          | 84.45 | 82.93 | 83.69          |       |       |                |
|          | +sib                   | 84.17 | 82.97 | 83.57          | 84.57 | 83.21 | 83.89          |       |       |                |
|          | +cop                   | 84.21 | 82.85 | 83.52          | 84.38 | 82.94 | 83.66          |       |       |                |
|          | +gp                    | 84.52 | 82.23 | 83.36          | 84.55 | 82.28 | 83.40          |       |       |                |
|          | +sib+cop               | 84.03 | 83.15 | 83.59          | 84.69 | 83.46 | <b>84.07</b>   |       |       |                |
|          | +sib+gp                | 84.15 | 83.06 | 83.60          | 84.35 | 83.07 | 83.70          |       |       |                |
|          | +cop+gp                | 84.44 | 82.93 | <b>83.68</b>   | 84.32 | 82.64 | 83.47          |       |       |                |
|          | <b>+ALL</b>            | 83.95 | 83.07 | 83.51          | 84.14 | 83.10 | 83.62          |       |       |                |
|          | baseline <sup>+B</sup> | 85.05 | 84.47 | 84.76          | 85.51 | 84.73 | 85.12          |       |       |                |
|          | +sib                   | 85.14 | 84.66 | 84.90          | 85.60 | 85.10 | 85.35          |       |       |                |
|          | +cop                   | 85.46 | 84.80 | 85.13          | 85.57 | 84.99 | 85.28          |       |       |                |
|          | +gp                    | 85.33 | 84.81 | 85.07          | 85.29 | 84.93 | 85.11          |       |       |                |
|          | +sib+cop               | 85.39 | 85.27 | 85.33          | 85.47 | 85.38 | 85.42          |       |       |                |
|          | +sib+gp                | 85.39 | 85.27 | 85.33          | 85.47 | 85.38 | 85.42          |       |       |                |
|          | +cop+gp                | 85.39 | 84.89 | 85.14          | 85.53 | 85.05 | 85.29          |       |       |                |
|          | <b>+ALL</b>            | 86.08 | 85.35 | <b>85.72</b>   | 86.15 | 85.49 | <b>85.82</b>   |       |       |                |
| CS       | baseline               | 90.25 | 88.84 | 89.54          | 89.98 | 88.47 | 89.22          | 89.98 | 88.47 | 89.22          |
|          | +sib                   | 90.37 | 88.78 | 89.57          | 90.17 | 88.52 | 89.34          | 89.89 | 88.44 | 89.16          |
|          | +cop                   | 90.43 | 88.82 | 89.62          | 90.16 | 88.53 | 89.34          | 89.86 | 88.45 | 89.15          |
|          | +gp                    | 90.38 | 88.70 | 89.53          | 90.21 | 88.34 | 89.26          | 89.86 | 88.30 | 89.07          |
|          | +sib+cop               | 90.73 | 88.94 | <b>89.82</b>   | 90.21 | 88.65 | 89.42          | 89.85 | 88.49 | 89.16          |
|          | +sib+gp                | 90.34 | 88.77 | 89.55          | 90.15 | 88.41 | 89.27          | 89.88 | 88.51 | 89.19          |
|          | +cop+gp                | 90.32 | 88.72 | 89.51          | 90.12 | 88.47 | 89.29          | 89.86 | 88.44 | 89.14          |
|          | <b>+ALL</b>            | 90.28 | 88.90 | 89.58          | 90.25 | 88.68 | <b>89.45</b>   | 89.82 | 88.85 | <b>89.33</b>   |
|          | baseline <sup>+B</sup> | 91.32 | 90.42 | 90.87          | 91.25 | 90.20 | 90.72          | 90.97 | 90.30 | 90.63          |
|          | +sib                   | 91.29 | 90.61 | 90.95          | 91.22 | 90.45 | 90.83          | 90.89 | 90.56 | 90.72          |
|          | +cop                   | 91.33 | 90.59 | <b>90.96</b>   | 91.32 | 90.50 | 90.91          | 90.99 | 90.58 | <b>90.78</b>   |
|          | +gp                    | 91.22 | 90.52 | 90.87          | 91.21 | 90.45 | 90.83          | 90.87 | 90.37 | 90.62          |
|          | +sib+cop               | 91.25 | 90.63 | 90.94          | 91.23 | 91.21 | <b>91.22</b>   | 90.84 | 90.55 | 90.69          |
|          | +sib+gp                | 91.31 | 90.55 | 90.93          | 91.31 | 90.37 | 90.84          | 90.82 | 90.48 | 90.65          |
|          | +cop+gp                | 91.18 | 90.63 | 90.91          | 91.20 | 90.47 | 90.83          | 90.84 | 90.66 | 90.75          |
|          | <b>+ALL</b>            | 91.22 | 90.55 | 90.89          | 91.23 | 90.37 | 90.80          | 90.74 | 90.42 | 90.58          |
| DE       | baseline               | 53.59 | 68.87 | 60.27          | 51.03 | 72.95 | 60.06          | 39.97 | 45.14 | 42.40          |
|          | +sib                   | 53.81 | 69.89 | 60.81          | 51.32 | 73.63 | <b>60.48</b>   | 40.26 | 46.01 | 42.94          |
|          | +cop                   | 52.34 | 68.70 | 59.41          | 50.41 | 72.70 | 59.54          | 39.82 | 45.79 | 42.60          |
|          | +gp                    | 53.42 | 69.72 | 60.49          | 50.72 | 73.38 | 59.98          | 40.19 | 45.30 | 42.59          |
|          | +sib+cop               | 53.28 | 70.29 | <b>60.61</b>   | 50.79 | 73.44 | 60.05          | 40.67 | 45.95 | <b>43.15</b>   |
|          | +sib+gp                | 53.15 | 69.72 | 60.32          | 50.21 | 72.58 | 59.36          | 39.92 | 45.19 | 42.39          |
|          | +cop+gp                | 53.13 | 68.53 | 59.86          | 51.17 | 72.77 | 60.09          | 40.14 | 44.87 | 42.37          |
|          | <b>+ALL</b>            | 53.10 | 69.21 | 60.09          | 50.67 | 72.46 | 59.63          | 40.59 | 44.98 | 42.67          |
|          | baseline <sup>+B</sup> | 57.87 | 80.14 | 67.21          | 55.67 | 83.18 | 66.70          | 37.99 | 43.13 | 40.40          |
|          | +sib                   | 57.68 | 80.76 | 67.30          | 55.70 | 83.98 | 66.98          | 39.00 | 44.38 | <b>41.51</b>   |
|          | +cop                   | 57.71 | 80.71 | 67.30          | 55.66 | 83.61 | 66.83          | 38.00 | 44.05 | 40.81          |
|          | +gp                    | 57.52 | 80.54 | 67.11          | 55.35 | 83.12 | 66.45          | 38.53 | 43.89 | 41.04          |
|          | +sib+cop               | 58.00 | 81.33 | <b>67.71</b>   | 55.86 | 84.17 | <b>67.15</b>   | 38.94 | 44.38 | 41.48          |
|          | +sib+gp                | 58.18 | 80.36 | 67.50          | 55.43 | 82.44 | 66.29          | 38.66 | 43.07 | 40.75          |
|          | +cop+gp                | 57.23 | 79.97 | 66.71          | 55.43 | 82.99 | 66.47          | 38.34 | 42.86 | 40.47          |
|          | <b>+ALL</b>            | 58.38 | 80.48 | 67.67          | 55.57 | 82.62 | 66.45          | 37.67 | 42.15 | 39.78          |
| EN       | baseline               | 85.18 | 82.58 | 83.86          | 86.12 | 85.34 | 85.73          | 74.51 | 73.48 | 73.99          |
|          | +sib                   | 85.36 | 83.21 | <b>84.27</b>   | 86.00 | 85.64 | 85.82          | 74.38 | 73.31 | 73.84          |
|          | +cop                   | 85.31 | 82.91 | 84.09          | 86.12 | 85.56 | 85.84          | 74.35 | 73.07 | 73.70          |
|          | +gp                    | 85.40 | 82.67 | 84.01          | 86.04 | 85.13 | 85.58          | 74.43 | 72.68 | 73.55          |
|          | +sib+cop               | 85.15 | 83.17 | 84.15          | 86.26 | 86.06 | <b>86.16</b>   | 74.76 | 73.65 | <b>74.20</b>   |
|          | +sib+gp                | 85.16 | 83.22 | 84.18          | 85.82 | 85.59 | 85.71          | 74.18 | 72.92 | 73.55          |
|          | +cop+gp                | 84.93 | 83.07 | 83.99          | 86.00 | 85.59 | 85.79          | 74.29 | 73.31 | 73.80          |
|          | <b>+ALL</b>            | 85.10 | 83.00 | 84.04          | 86.16 | 85.56 | 85.86          | 74.65 | 73.17 | 73.90          |
|          | baseline <sup>+B</sup> | 88.21 | 85.64 | 86.90          | 88.51 | 88.05 | 88.28          | 80.49 | 79.65 | 80.07          |
|          | +sib                   | 88.19 | 85.88 | 87.02          | 88.66 | 88.39 | 88.52          | 80.41 | 79.84 | 80.13          |
|          | +cop                   | 88.13 | 86.00 | 87.05          | 88.39 | 88.30 | 88.34          | 80.32 | 80.26 | <b>80.29</b>   |
|          | +gp                    | 88.54 | 85.41 | 86.95          | 89.01 | 87.98 | 88.49          | 80.63 | 79.24 | 79.93          |
|          | +sib+cop               | 88.01 | 86.40 | <b>87.20</b>   | 88.55 | 88.60 | 88.57          | 79.87 | 79.89 | 79.88          |
|          | +sib+gp                | 88.38 | 85.78 | 87.06          | 88.82 | 88.19 | 88.50          | 80.57 | 79.55 | 80.06          |
|          | +cop+gp                | 88.16 | 85.79 | 86.96          | 88.59 | 88.20 | 88.40          | 80.35 | 80.11 | 80.23          |
|          | <b>+ALL</b>            | 87.98 | 86.25 | 87.11          | 88.77 | 88.62 | <b>88.70</b>   | 80.01 | 79.80 | 79.90          |

Table 9: w/o pre-identified predicate results.

| Language | Method                 | Dev   |       |                | Test  |       |                | OOD |   |                |
|----------|------------------------|-------|-------|----------------|-------|-------|----------------|-----|---|----------------|
|          |                        | P     | R     | F <sub>1</sub> | P     | R     | F <sub>1</sub> | P   | R | F <sub>1</sub> |
| ES       | baseline               | 83.35 | 81.79 | 82.57          | 83.52 | 81.58 | 82.54          |     |   |                |
|          | +sib                   | 83.72 | 82.42 | <b>83.06</b>   | 83.66 | 82.26 | 82.96          |     |   |                |
|          | +cop                   | 83.59 | 82.09 | 82.84          | 83.70 | 82.15 | 82.91          |     |   |                |
|          | +gp                    | 83.74 | 81.57 | 82.64          | 83.98 | 81.18 | 82.55          |     |   |                |
|          | +sib+cop               | 83.41 | 82.11 | 82.75          | 83.87 | 82.38 | <b>83.11</b>   |     |   |                |
|          | +sib+gp                | 83.56 | 82.35 | 82.95          | 83.49 | 82.18 | 82.83          |     |   |                |
|          | +cop+gp                | 83.65 | 81.61 | 82.62          | 83.87 | 81.86 | 82.85          |     |   |                |
|          | <b>+ALL</b>            | 83.72 | 82.09 | 82.90          | 83.64 | 82.18 | 82.90          |     |   |                |
|          | baseline <sup>+B</sup> | 85.88 | 85.21 | 85.55          | 85.92 | 85.09 | 85.50          |     |   |                |
|          | +sib                   | 85.99 | 84.89 | 85.44          | 86.19 | 85.13 | 85.66          |     |   |                |
|          | +cop                   | 85.81 | 85.28 | 85.55          | 85.90 | 85.27 | 85.58          |     |   |                |
|          | +gp                    | 85.85 | 85.30 | 85.57          | 85.84 | 85.12 | 85.48          |     |   |                |
|          | +sib+cop               | 85.66 | 85.64 | 85.65          | 86.21 | 85.75 | <b>86.00</b>   |     |   |                |
|          | +sib+gp                | 86.20 | 84.93 | 85.56          | 86.32 | 85.02 | 85.66          |     |   |                |
|          | +cop+gp                | 85.88 | 85.09 | 85.48          | 85.76 | 84.94 | 85.35          |     |   |                |
|          | <b>+ALL</b>            | 86.08 | 85.35 | <b>85.72</b>   | 86.15 | 85.49 | 85.82          |     |   |                |
| JA       | baseline               | 79.86 | 68.68 | 73.85          | 79.67 | 68.53 | 73.68          |     |   |                |
|          | +sib                   | 78.92 | 70.12 | 74.26          | 77.77 | 70.01 | 73.69          |     |   |                |
|          | +cop                   | 79.51 | 68.92 | 73.83          | 79.48 | 69.23 | 74.00          |     |   |                |
|          | +gp                    | 79.23 | 69.39 | 73.98          | 78.14 | 69.24 | 73.42          |     |   |                |
|          | +sib+cop               | 79.78 | 70.47 | <b>74.84</b>   | 79.14 | 69.57 | 74.05          |     |   |                |
|          | +sib+gp                | 79.99 | 69.22 | 74.22          | 79.77 | 68.98 | 73.98          |     |   |                |
|          | +cop+gp                | 80.45 | 69.04 | 74.31          | 79.91 | 69.01 | 74.06          |     |   |                |
|          | <b>+ALL</b>            | 80.37 | 69.06 | 74.28          | 80.04 | 69.16 | <b>74.20</b>   |     |   |                |
|          | baseline <sup>+B</sup> | 81.20 | 74.84 | 77.89          | 82.03 | 74.24 | 77.94          |     |   |                |
|          | +sib                   | 82.77 | 74.49 | 78.41          | 80.53 | 76.86 | 78.65          |     |   |                |
|          | +cop                   | 82.61 | 74.35 | 78.27          | 82.33 | 75.36 | 78.69          |     |   |                |
|          | +gp                    | 82.15 | 74.16 | 77.95          | 80.98 | 75.48 | 78.13          |     |   |                |
|          | +sib+cop               | 81.55 | 75.84 | <b>78.59</b>   | 82.16 | 75.85 | <b>78.88</b>   |     |   |                |
|          | +sib+gp                | 82.28 | 73.62 | 77.71          | 82.10 | 75.04 | 78.41          |     |   |                |
|          | +cop+gp                | 82.14 | 74.89 | 78.35          | 81.35 | 75.73 | 78.44          |     |   |                |
|          | <b>+ALL</b>            | 82.72 | 74.21 | 78.23          | 81.88 | 75.39 | 78.50          |     |   |                |
| ZH       | baseline               | 82.00 | 80.20 | 81.09          | 83.08 | 79.91 | 81.46          |     |   |                |
|          | +sib                   | 82.34 | 80.42 | 81.37          | 83.04 | 80.00 | 81.50          |     |   |                |
|          | +cop                   | 83.04 | 79.81 | 81.40          | 83.65 | 79.50 | 81.52          |     |   |                |
|          | +gp                    | 82.84 | 78.73 | 80.73          | 83.71 | 78.25 | 80.89          |     |   |                |
|          | +sib+cop               | 82.70 | 80.19 | 81.43          | 83.07 | 80.99 | <b>82.01</b>   |     |   |                |
|          | +sib+gp                | 82.87 | 79.89 | 81.35          | 83.31 | 79.52 | 81.37          |     |   |                |
|          | +cop+gp                | 82.97 | 79.07 | 80.98          | 83.63 | 78.87 | 81.18          |     |   |                |
|          | <b>+ALL</b>            | 83.19 | 79.86 | <b>81.49</b>   | 83.51 | 79.59 | 81.50          |     |   |                |
|          | baseline <sup>+B</sup> | 86.42 | 84.20 | 85.29          | 86.82 | 83.98 | 85.38          |     |   |                |
|          | +sib                   | 86.24 | 84.78 | 85.51          | 86.47 | 84.63 | 85.54          |     |   |                |
|          | +cop                   | 86.34 | 84.72 | 85.52          | 86.55 | 84.54 | 85.53          |     |   |                |
|          | +gp                    | 85.90 | 84.24 | 85.07          | 86.37 | 84.00 | 85.17          |     |   |                |
|          | +sib+cop               | 86.53 | 84.61 | <b>85.56</b>   | 86.83 | 84.57 | <b>85.68</b>   |     |   |                |
|          | +sib+gp                | 86.33 | 84.74 | 85.53          | 86.64 | 84.58 | 85.60          |     |   |                |
|          | +cop+gp                | 86.28 | 84.63 | 85.45          | 86.61 | 84.66 | 85.63          |     |   |                |
|          | <b>+ALL</b>            | 85.63 | 84.99 | 85.31          | 85.90 | 84.90 | 85.39          |     |   |                |

Table 10: w/o pre-identified predicate results.
